# Supplementary material for: Dual-recognition driven sensing platform based on a BSA-Cu NP nanozyme combined with smartphone-assistance for fluorometric/colorimetric monitoring of dopamine
Source: Royal Society of Chemistry journal article supplement (doi:10.1039/d4ra07209j), 2025-01-01
Supplement: d4ra07209j1.pdf [file d4ra07209j1.pdf]

*Electronic Supplementary Information*

**Dual-recognition driven sensing platform based on BSA-Cu NPs  
nanozyme combined with smartphone-assistance for  
fluorometric/colorimetric monitoring of dopamine**

Da-Qian Feng, Shaofei Wang, Zhendi Yu, Wenfeng Zhang and Guoliang Liu\*

*School of Chemistry and Chemical Engineering, Yancheng Institute of Technology, Jiangsu  
224051, P. R. China.*

*Fax: +86-515-88298190; E-mail: liuguoliang199@126.com, glliu@ycit.edu.cn.*

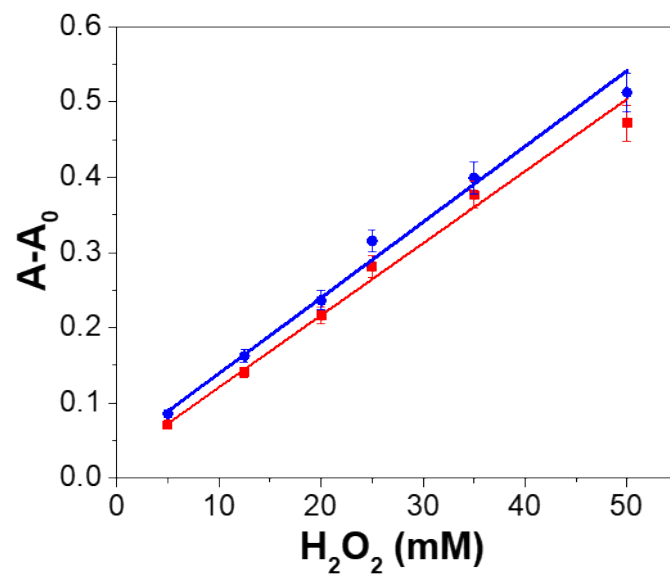

**Fig. S1** Comparison the calibration curves of H<sub>2</sub>O<sub>2</sub> concentration by our proposed BSA-Cu NPs-based approach (red curve) with Fenton reaction (blue curve).
